# Supplementary material for: Drosophila STING protein has a role in lipid metabolism
Source: eLife journal article supplement (doi:10.7554/elife.67358), 2021-09-01

# Source data for Supplementary Figure 1B

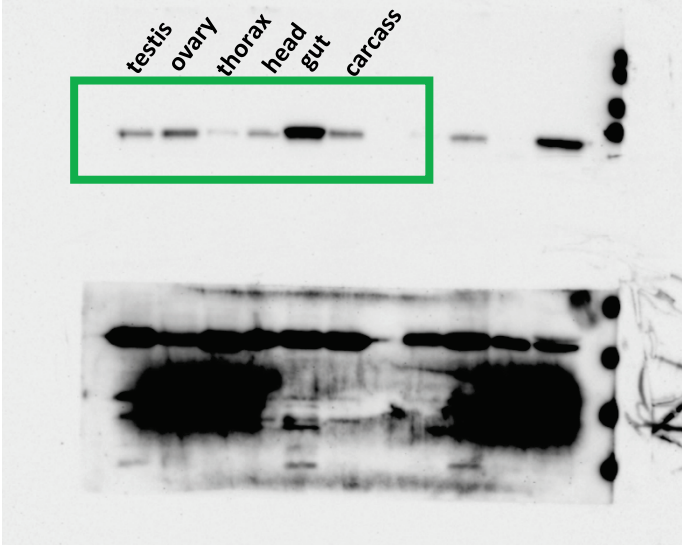

# Source data for Supplementary Figure 1D

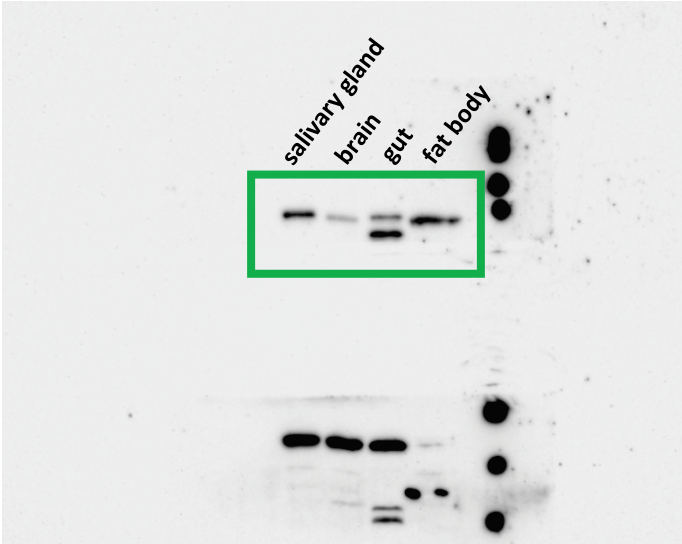

Supplement: fig1-figsupp1-data1 [file elife-67358-fig1-figsupp1-data1-v3.pdf]
