# Supplementary material for: Drosophila STING protein has a role in lipid metabolism
Source: eLife. 2021 Sep 1;10:e67358. doi: 10.7554/eLife.67358 (PMC8443252; doi:10.7554/eLife.67358)
Supplement: Figure 1—source data 1. [file elife-67358-fig1-data1.xlsx]

## Sheet: Starvation Males
hours	w¹¹¹⁸(n=190)	dSTINGΔ (n=169)	dSTINGΔ;GFP-dSTING (n=181)
0	100	100	100
12	100	100	100
12	100	99.7	100
24	100	99.7	100
24	98	58.2	89.8
36	98	58.2	89.8
37	73	0	35.7
48	73		35.7
48	38.1		14
60	38.1		14
60	3.1		3.5
72	3.1		3.5
72	0.3		1.8
84	0.3		1.8
84	0		0

## Sheet: Starvation Females
hours	w¹¹¹⁸ (n=147)	dSTINGΔ (n=195)	dSTINGΔ;GFP-dSTING (n=172)
0	100	100	100
12	100	100	100
12	100	100	100
24	100	100	100
24	100	99.4	99.5
36	100	99.4	99.5
37	99.1	93.9	98.4
48	99.1	93.9	98.4
48	93	58.1	88.9
60	93	58.1	88.9
60	90.5	15.6	59.9
72	90.5	15.6	59.9
72	84.9	0.4	36.8
84	84.9	0.4	36.8
84	60	0	17.1
96	60	0	17.1
96	37.2		7.4
108	37.2		7.4
108	5		1
120	5		1
120	0		0

## Sheet: OxidStress Males
hours	w¹¹¹⁸(n=152)	dSTINGΔ (n=152)	dSTINGΔ;GFP-dSTING (n=128)
0	100	100	100
12	100	100	100
12	100	99.2	100
24	100	99.2	100
24	100	99.2	100
36	100	99.2	100
36	99.4	75.6	96.2
48	99.4	75.6	96.2
48	97.8	11.23	75.1
60	97.8	11.23	75.1
60	84.4	0.7	35.8
72	84.4	0.7	35.8
72	26.7	0	6.4
84	26.7		6.4
84	12.3		1.5
96	12.3		1.5
96	1.6		0
108	1.6
108	0

## Sheet: OxidStress Females
hours	w¹¹¹⁸ (n=146)	dSTINGΔ (n=120)	dSTINGΔ;GFP-dSTING (n=69)
0	100	100	100
12	100	100	100
12	100	100	100
24	100	100	100
24	100	100	100
36	100	100	100
37	98.4	96	100
48	98.4	96	100
48	96.6	74.2	98.43
60	96.6	74.2	98.43
60	86.6	31.2	88.6
72	86.6	31.2	88.6
72	45.7	4.8	48.59
84	45.7	4.8	48.59
84	19.6	0	33.7
96	19.6		33.7
96	5.1		13.32
108	5.1		13.32
108	0		4.69
120			4.69
120			0

## Sheet: Lifespan Males
days	w¹¹¹⁸(n=100)	dSTINGΔ (n=101)
0	100	100
7	100	100
7	100	98.9474
11	100	98.9474
11	100	98.9474
14	100	98.9474
14	100	97.9474
21	100	97.9474
21	100	97.9474
23	100	97.9474
23	100	97.9474
25	100	97.9474
25	100	96.9474
27	100	96.9474
27	100	96.0383
31	100	96.0383
31	100	96.0383
33	100	96.0383
33	100	96.0383
35	100	96.0383
35	100	96.0383
37	100	96.0383
37	98	94.0383
39	98	94.0383
39	98	91.0383
41	98	91.0383
41	97	90.0383
43	97	90.0383
43	95	88.9857
45	95	88.9857
45	92	86.0766
47	92	86.0766
47	86	85.1675
49	86	85.1675
49	86	82.1675
51	86	82.1675
51	80	77.1531
53	80	77.1531
53	71	73.9952
55	71	73.9952
55	59	70.9426
57	59	70.9426
57	53	65.8899
59	53	65.8899
59	39	60.9282
61	39	60.9282
61	31	54.9139
67	31	54.9139
67	14	35.2105
69	14	35.2105
69	12	34.3014
73	12	34.3014
73	4	15.6507
75	4	15.6507
75	3	10.8325
77	3	10.8325
77	3	6.87081
79	3	6.87081
79	0	5.87081
81	0	5.87081
81		2.81818
83		2.81818
83		1.81818
85		1.81818
85		0

## Sheet: Lifespan Females
days	w¹¹¹⁸ (n=79)	dSTINGΔ (n=76)
0	100	100
7	100	100
7	100	100
11	100	100
11	98.75	100
14	98.75	100
14	98.75	100
21	98.75	100
21	97.4342	98.75
23	97.4342	98.75
23	96.1842	98.75
25	96.1842	98.75
25	93.6842	97.5
27	93.6842	97.5
27	92.4342	96.25
31	92.4342	96.25
31	92.4342	96.25
33	92.4342	96.25
33	91.1842	93.75
35	91.1842	93.75
35	91.1842	90.9375
37	91.1842	90.9375
37	89.8684	86.5625
39	89.8684	86.5625
39	87.2368	86.5625
41	87.2368	86.5625
41	82.2368	85.3125
43	82.2368	85.3125
43	79.7368	85.3125
45	79.7368	85.3125
45	68.2895	82.8125
47	68.2895	82.8125
47	58.0921	77.8125
49	58.0921	77.8125
49	54.2763	76.5625
51	54.2763	76.5625
51	49.2105	74.0625
53	49.2105	74.0625
53	44.0789	71.5625
55	44.0789	71.5625
55	36.5789	67.8125
57	36.5789	67.8125
57	32.8289	66.5625
59	32.8289	66.5625
59	19.0132	58.4375
61	19.0132	58.4375
61	13.8816	55.625
67	13.8816	55.625
67	1.25	32.1875
69	1.25	32.1875
69	1.25	28.125
73	1.25	28.125
73	0	10
75	0	10
75		5.625
77		5.625
77		0
