# Supplementary material for: Drosophila STING protein has a role in lipid metabolism
Source: eLife. 2021 Sep 1;10:e67358. doi: 10.7554/eLife.67358 (PMC8443252; doi:10.7554/eLife.67358)
Supplement: Figure 2—source data 1. [file elife-67358-fig2-data1.xlsx]

## Sheet: TAG
FED			STARVED
w1118	dSTINGΔ	dSTINGΔ;GFP-dSTING	w1118	dSTINGΔ	dSTINGΔ;GFP-dSTING
0.33	0.174	0.218	0.262	0.01	0.229
0.336	0.184	0.24	0.313	0.012	0.122
0.357	0.194	0.26	0.268	0.021	0.129
0.375	0.2	0.261	0.266	0.026	0.267
0.382	0.207	0.278	0.334	0.043	0.261
0.389	0.208	0.292	0.241		0.241
0.398	0.21	0.294
0.409	0.217	0.305
0.412	0.221	0.328
0.421	0.221	0.341
0.435	0.227	0.348
0.437	0.229	0.351
0.44	0.234	0.365
0.454	0.238	0.369
0.458	0.25	0.387
0.472	0.254	0.388
0.475	0.256	0.43
0.527	0.261	0.432
0.528
0.533

## Sheet: Glycogen
FED			STARVED
w1118	dSTINGΔ	dSTINGΔ;GFP-dSTING	w1118	dSTINGΔ	dSTINGΔ;GFP-dSTING
0.3	0.178	0.232	0.149491	0.058374	0.041517
0.31	0.194	0.253	0.088009	0.052855	0.051001
0.325	0.227	0.255	0.094373	0.084807	0.045861
0.328	0.246	0.311	0.130826	0.04286
0.335	0.258	0.352	0.169001	0.040036
	0.281	0.371	0.111421	0.043135

## Sheet: Trehalose
FED			STARVED
w1118	dSTINGΔ	dSTINGΔ;GFP-dSTING	w1118	dSTINGΔ	dSTINGΔ;GFP-dSTING
12	7	10.6	6.95	3.875	1.055
16.8	8.8	9.7	5.99	3.24	3.875
16.25	6.45	10.275	10.7	2.08	4.23
13.4	3.8	8.2
11	7.7	14
15

## Sheet: Glucose
FED			STARVED
w1118	dSTINGΔ	dSTINGΔ;GFP-dSTING	w1118	dSTINGΔ	dSTINGΔ;GFP-dSTING
9	11.4	6.3	2.8	1.65	1.15
8.1	13.3	12.1	3.01	1.505	1.505
5.9	13.8	9.5	3.2	1.6	2.45
7.6	12.8	9.3
4.9	15.2	13.6
5.2	20	6.4
7.5	14.8
7	15.8
6.2

## Sheet: LipidArea FatBody
w1118	dSTINGΔ	dSTINGΔ;GFP-dSTING
1.08036	0.841297	1.1124
0.941979	0.782038	0.914251
1.19423	0.619474	0.837236
1.02009	0.7959	0.772313
0.784491	0.657093	0.873417
1.1414	0.573488	0.817882
0.831657	0.739684	0.858797
0.879588	0.553791	1.19643
1.09431	0.587182	1.08569
0.981793	0.64788	0.823375
1.0501	0.507384	0.725146
	0.596737	1.05399
	0.467986	0.977988
		0.766569
		0.674848

## Sheet: LipidArea Guts
w1118	dSTINGΔ	dSTINGΔ;GFP-dSTING
0.62173	1.03554	0.611538
1.05796	0.921383	0.84596
1.26649	1.21492	0.815384
1.37066	1.14358	1.25773
0.974383	1.07019	1.13338
0.919345	0.550384	1.01311
1.21696	1.05796	0.811307
0.670653	0.936876	0.974383
0.901814		0.892845
		0.597268
