# Supplementary material for: Drosophila STING protein has a role in lipid metabolism
Source: eLife. 2021 Sep 1;10:e67358. doi: 10.7554/eLife.67358 (PMC8443252; doi:10.7554/eLife.67358)
Supplement: Figure 5—figure supplement 1—source data 1. [file elife-67358-fig5-figsupp1-data1.xlsx]

## Sheet: Sheet1
Row Labels	wt1	wt2	wt3	m1	m2	m3
[NEG]>6-phosphogluconate_C0	30194630	32934758	30670456	71730320	77661616	92849720		"wt" - w1118
[NEG]>acetyl-CoA_C0	68340152	87361848	60498640	67002136	78387168	114554672		"m" - dSTINGΔ
[NEG]>ADP	7014986240	7308555776	7034116608	7809639424	7010927104	5687283200
[NEG]>allantoin	639233920	545008448	716141632	78807496	78514984	109069344
[NEG]>alpha-ketoglutarate_C0	1101579392	1279684992	1409769088	1609838848	2318944768	3240103936
[NEG]>ATP	1128448896	1075670016	1032707904	4367197184	4659915264	5183013888
[NEG]>cAMP	44900612	44862928	48328244	64711716	67577648	67680128
[NEG]>CDP_C0	65517032	67727952	66131812	36245416	39248184	41473276
[NEG]>cis-aconitate	1954970112	2107702656	2104123008	2587821312	3129012480	2823531264
[NEG]>citrate_C0	16600236032	17622499328	18044983296	15127151616	17131994112	19394637824
[NEG]>CMP_C0	157342560	162395248	166756144	20836942	23963234	22586992
[NEG]>CTP	16011848	14381195	13319833	57236148	62706656	69750720
[NEG]>fructose-1,6-bisphosphate	681414336	527124992	513760064	847735616	965365312	957843456
[NEG]>fructose-1-phosphate/fructose-6-phosphate/mannose-1-phosphate/mannose-6-phosphate	3809041152	4473189376	4987549184	3086023936	3648544000	4017988352
[NEG]>fumarate_C0	1659080448	1828198144	2026465280	1755006720	2039593600	2271044096
[NEG]>GDP	266963440	274915360	293378976	160955408	145700112	112812264
[NEG]>glucose_C0	26175139840	25601026048	26333988864	16970166272	19444324352	19266150400
[NEG]>glucose-6-phosphate_C0	7355539456	8767366144	9604825088	4540860416	5344723456	5658453504
[NEG]>glycerol-3-phosphate_C0	2990731264	4042871808	5159345152	3536671488	4653088256	5295493120
[NEG]>GMP_C0	824041216	946550720	984387968	75927896	82517720	73655304
[NEG]>GTP	36895800	33765520	32773640	87567968	92329016	110574592
[NEG]>isocitrate	2321368576	2401578752	2710607616	2561871616	2544455680	2672108032
[NEG]>malate_C0	27671048192	28513857536	30673184768	23345457152	25974454272	28111296512
[NEG]>malonyl-CoA	7563515	7386503	6233743	22916506	29175124	34625600
[NEG]>methylmalonate	660183360	571009728	566553792	843065728	823153728	737665344
[NEG]>myo-inositol	479961856	536264800	559193600	445667488	489682784	498066816
[NEG]>phosphoenolpyruvate_C0	143147072	111534360	121541944	289457856	551434304	606450752
[NEG]>succinate_13C4	334023520	342352608	342606624	302789408	325635968	356931776
[NEG]>succinate_C0	25376870400	29000773632	32251697152	23788457984	26577221632	27384684544
[NEG]>UDP	252968320	243183616	245422736	253059632	284443616	290582272
[NEG]>UMP_C0	1827905280	2003687680	2052010496	260325680	236372720	190391920
[NEG]>UTP	65301916	55743428	52969100	297836064	303953152	337425696
[POS]>AMP_C0	17554948096	17595949056	18289483776	3268209152	3632429824	3772600832
[POS]>argininosuccinate	30580920	30115582	31447294	50077244	59778896	62708648
[POS]>biotin	145747648	156931232	196428400	338059808	369783200	380491008
[POS]>carnitine_d3	7678807552	7271107584	7398346752	5920030720	6244952064	6610437120
[POS]>Coenzyme-A	131815080	139157344	143732592	118050512	136348256	162257872
[POS]>flavin-adenine-dinucleotide	162363024	177567696	180089104	158370832	170672432	165098000
[POS]>IMP_C0	516001632	706535168	823829824	170734112	193906992	235076272
[POS]>ITP	3694431	4038967	3166921	5910274	4288289	3877586
[POS]>NAD	2265093632	2363663872	2315390976	2371057920	2386563584	2385342976
[POS]>NADP	155042784	148147120	153014160	89414528	88763368	72586720
[POS]>NADPH	40777324	58934356	68124992	45844788	60073380	84946840
[POS]>pantothenate	20817317888	20837982208	21927954432	29400270848	30001082368	32204617728
