# Supplementary material for: Drosophila STING protein has a role in lipid metabolism
Source: eLife. 2021 Sep 1;10:e67358. doi: 10.7554/eLife.67358 (PMC8443252; doi:10.7554/eLife.67358)
Supplement: Figure 5—source data 4. [file elife-67358-fig5-data4.xlsx]

## Sheet: ACC activity
w1118	dSTINGΔ	dSTINGΔ;GFP-dSTING
70.4	52.9	73.2
70	90.8	66.6
51.8	85	68.8
41	80.3	62.3
67.9	58.6	59.4
74.8

## Sheet: FASN activity
w1118	dSTINGΔ	dSTINGΔ;GFP-dSTING
0.00708	0.00438	0.00883
0.0085	0.00565	0.01022
0.00907	0.00396	0.00927
0.00899	0.0045	0.00936
0.00668	0.0049	0.01006
0.00594	0.00593	0.00939
0.00873	0.00545	0.01006
0.00817		0.00916

## Sheet: malonyl-CoA level
	w1118			dSTINGΔ
Acetyl-CoA	0.948288	1.21223	0.839479	0.929722	1.0877	1.58956
Malonyl-CoA	1.07113	1.04606	0.88281	3.24539	4.13172	4.9036
